# Supplementary material for: Study protocol for a randomised trial evaluating the non-inferiority of stepped palliative care versus early integrated palliative care for patients with advanced lung cancer
Source: PubMed Central journal article supplement — BMJ Open. 2022 Feb 10;12(2):e057591. doi: 10.1136/bmjopen-2021-057591 (PMC8845218; doi:10.1136/bmjopen-2021-057591), 2022-02-10
Supplement: bmjopen-2021-057591.reviewer_comments.pdf [file bmjopen-2021-057591.reviewer_comments.pdf]

## PEER REVIEW HISTORY

BMJ Open publishes all reviews undertaken for accepted manuscripts. Reviewers are asked to complete a checklist review form (<http://bmjopen.bmj.com/site/about/resources/checklist.pdf>) and are provided with free text boxes to elaborate on their assessment. These free text comments are reproduced below.

## ARTICLE DETAILS

|                            |                                                                                                                                                                                                                                                                  |
|----------------------------|------------------------------------------------------------------------------------------------------------------------------------------------------------------------------------------------------------------------------------------------------------------|
| <b>TITLE (PROVISIONAL)</b> | Study Protocol for a Randomized Trial Evaluating the Non-Inferiority of Stepped Palliative Care versus Early Integrated Palliative Care for Patients with Advanced Lung Cancer                                                                                   |
| <b>AUTHORS</b>             | Post, Kathryn; Heuer, Lauren; Kamal, Arif; Kumar, Pallavi; Elyze, Madeleine; Griffith, Sarah; Han, Jacqueline; Friedman, Fred; Jackson, Ashley; Trotter, Chardria; Plotke, Rachel; Vyas, Charu; Jackson, Vicki; Rabideau, Dustin; Greer, Joseph; Temel, Jennifer |

This article was not externally reviewed at BMJ Open. Protocols that have been independently assessed prior to submission to BMJ Open are usually fast-tracked to publication on the grounds that further substantial changes will not be possible. This independent assessment will usually be external, independent review for both a substantial grant award from a non-commercial or government funder and ethics approval.
